# Supplementary material
Source: PubMed Central journal article supplement (PMC7687857)
Supplement: develop-147-190140-s1.pdf [file develop-147-190140-s1.pdf]

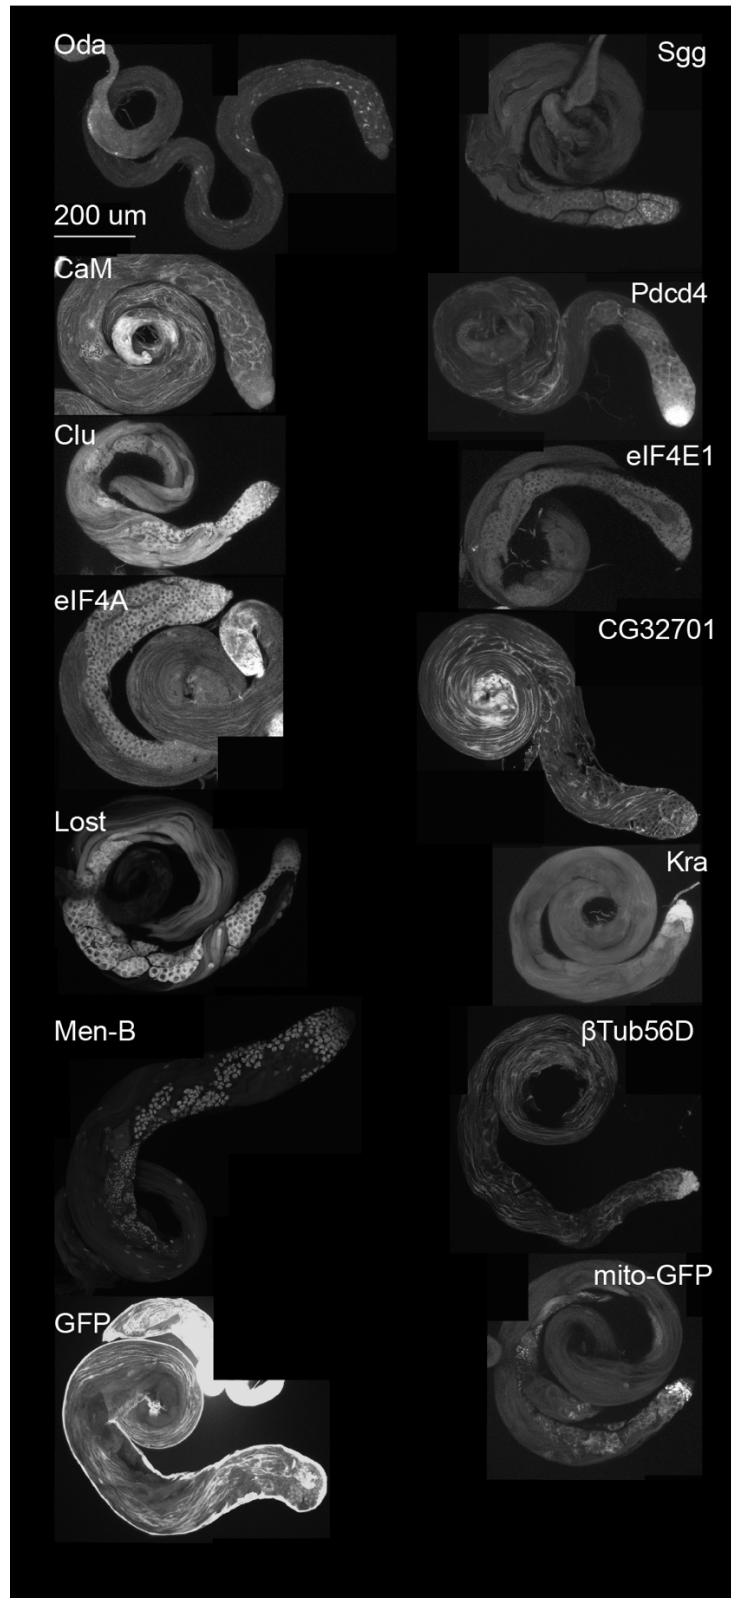

**Figure S1. GFP expression pattern of FlyTrap lines used in FLIP imaging.** Whole mount testes of each of the protein traps used for FLIP imaging to demonstrate differing patterns and levels of GFP expression. Non-FlyTrap lines expressing GFP and mito-GFP were also used.

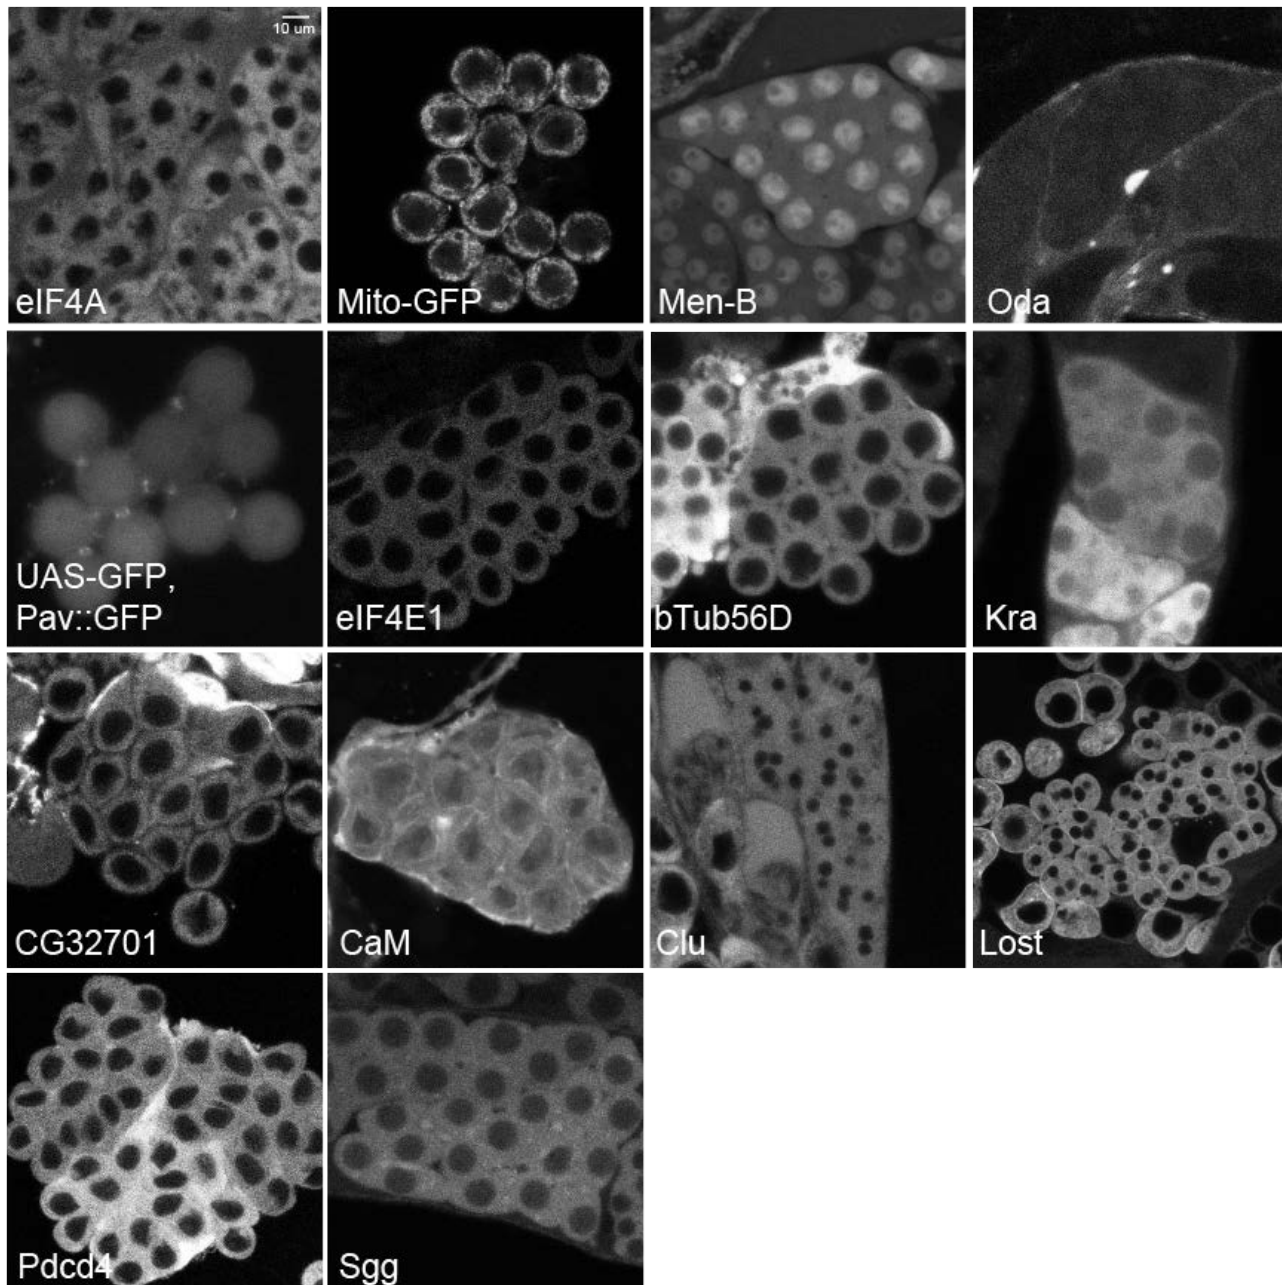

**Figure S2. Expression in 16-cell cysts of all FlyTrap lines used for FLIP.** Fixed examples of 16-cell cysts of each of the protein traps used for FLIP imaging to demonstrate differing patterns and levels of GFP expression. Non-FlyTrap lines expressing GFP and mito-GFP are also shown.

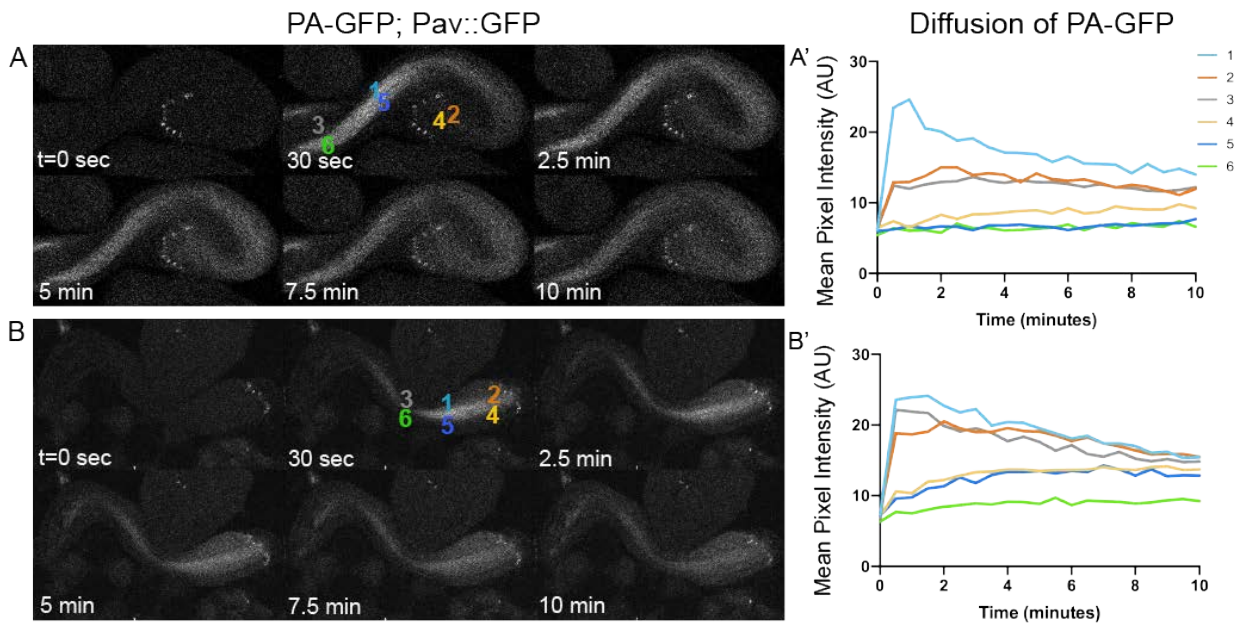

**Figure S3. Movement of PA-GFP occurs through the RCs faster than through the tail perforations.** (A-B) Still images of 10-minute movies capturing movement of PA-GFP in spermatid tails after activation in region 1. (A'-B') Quantification of PA-GFP fluorescence in several different locations along the spermatid tails show that PA-GFP is first observed near the RCs (region 4) rather than having traveled through the perforations (region 5).

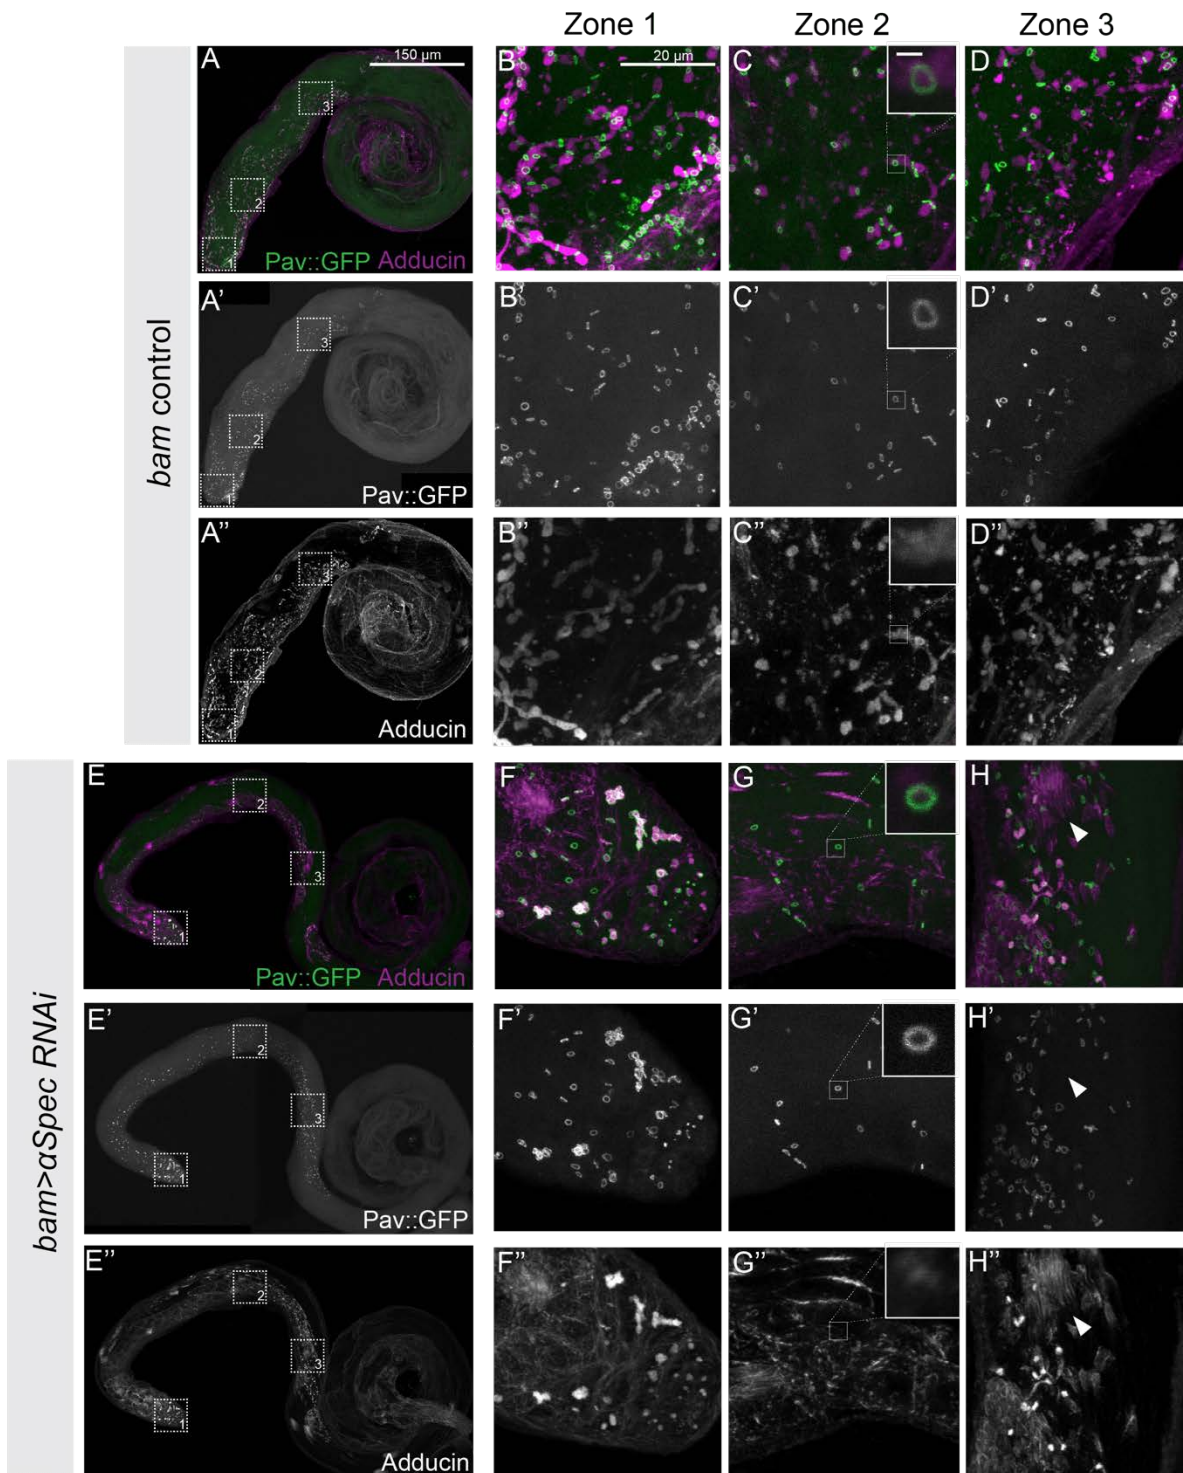

**Figure S4. Fusome disruption by RNAi against  $\alpha$ Spectrin using *bam-Gal4* (Adducin staining).** (A) Wild-type testis with RCs marked by Pav::GFP and fusomes labeled with Adducin antibody (1B1). (B-D) Closeups of the regions marked by box in (A), highlighting the RCs (Pav, green) and fusome (Adducin, purple) in a wild-type testis in three different stages of development: mitotic (Zone 1), post-mitotic (Zone 2), and elongated spermatids (Zone 3). Insets in (C-C'') highlight one RC, scale bar is 1  $\mu$ m. (E) Testes with  $\alpha$ Spectrin RNAi lack Adducin staining at the fusome, but testis morphology appears unaffected. (F-H) Closeups of the regions marked in (E) showing Hts1B1 staining at the membrane rather than in a fusome pattern while Pav::GFP remained localized to the RCs. Small fusome-like fragments were observed in Zones 2 and 3.

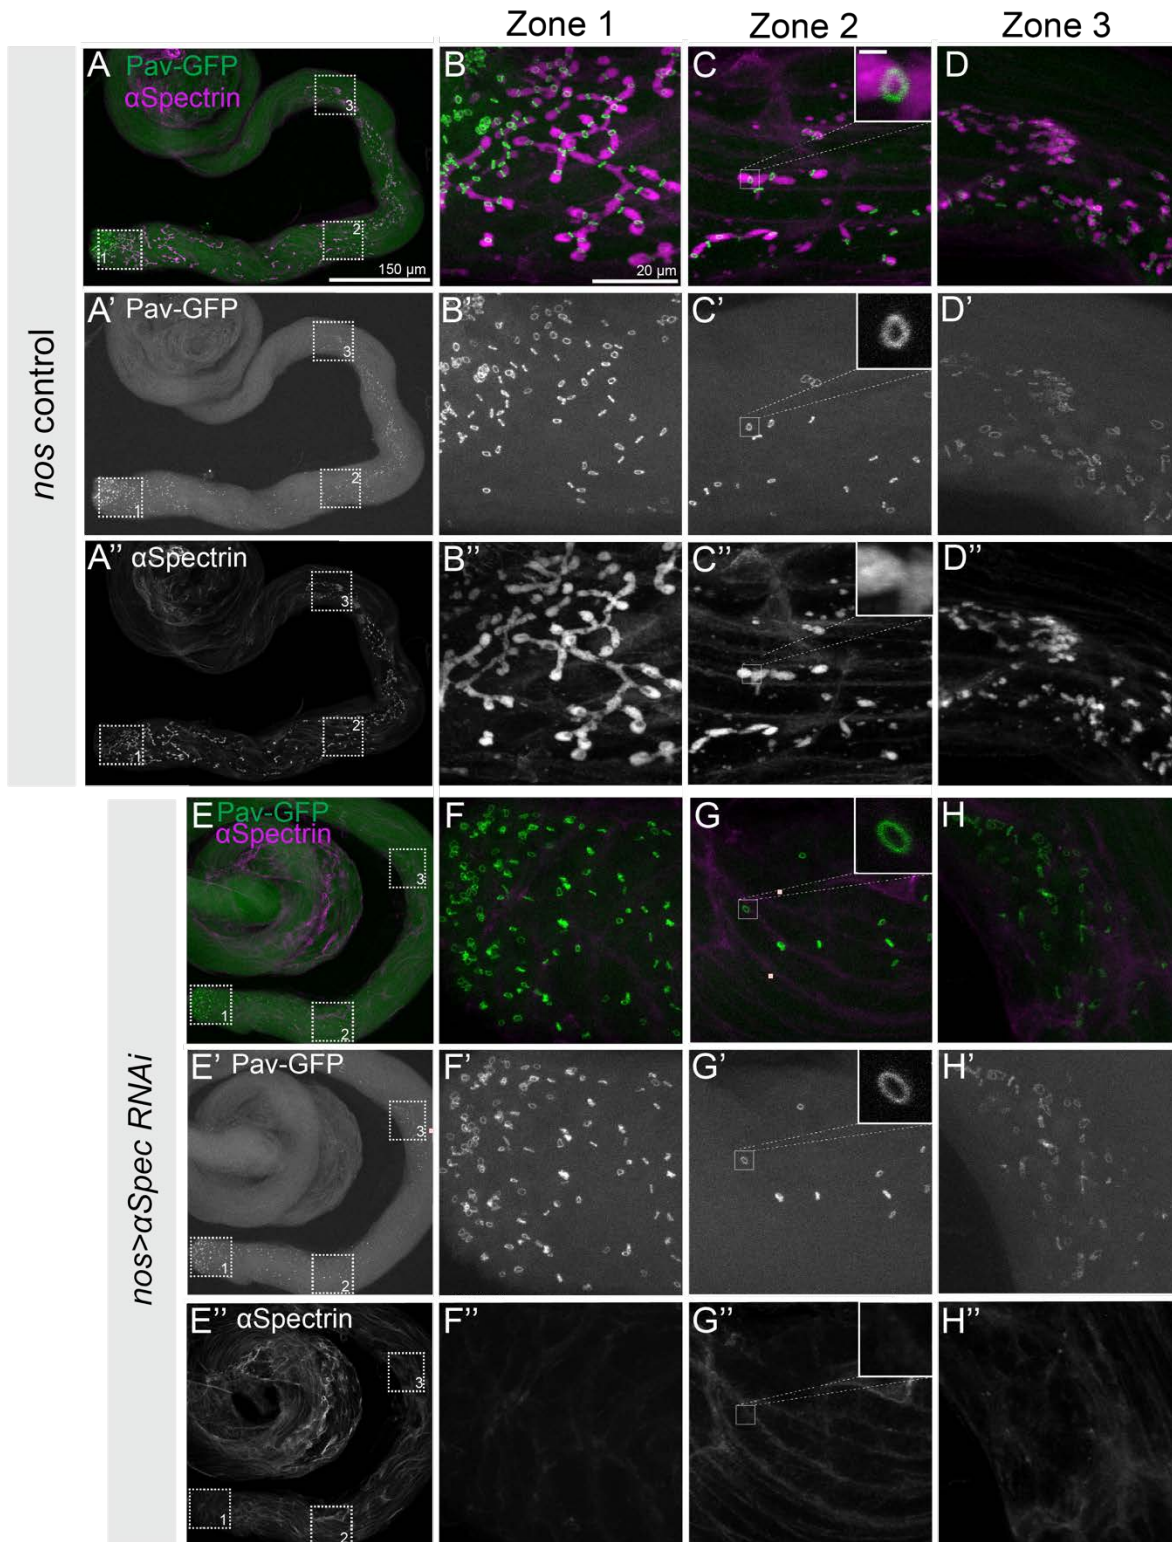

**Figure S5. Fusome disruption by RNAi against  $\alpha$ Spectrin using *nos-Gal4* ( $\alpha$ Spectrin staining).** (A) Wholemount Pav::GFP testis stained with  $\alpha$ Spectrin antibody showed staining of the fusome similar to Hts1B1 (Adducin) antibody. (B-D) Close up of regions marked in (A) showing  $\alpha$ Spectrin staining at wild-type RCs (B'-D') and the fusome (B''-D'') at various stages of sperm development. (E) Disruption of fusome using *nos-Gal4*> $\alpha$ Spectrin RNAi showed a lack of  $\alpha$ Spectrin staining at the fusome, but gross testis morphology appears unaffected. (F-H) Close up of insets from (E) showing intact RCs (F'-H') despite loss of  $\alpha$ Spectrin staining (F''-H'').

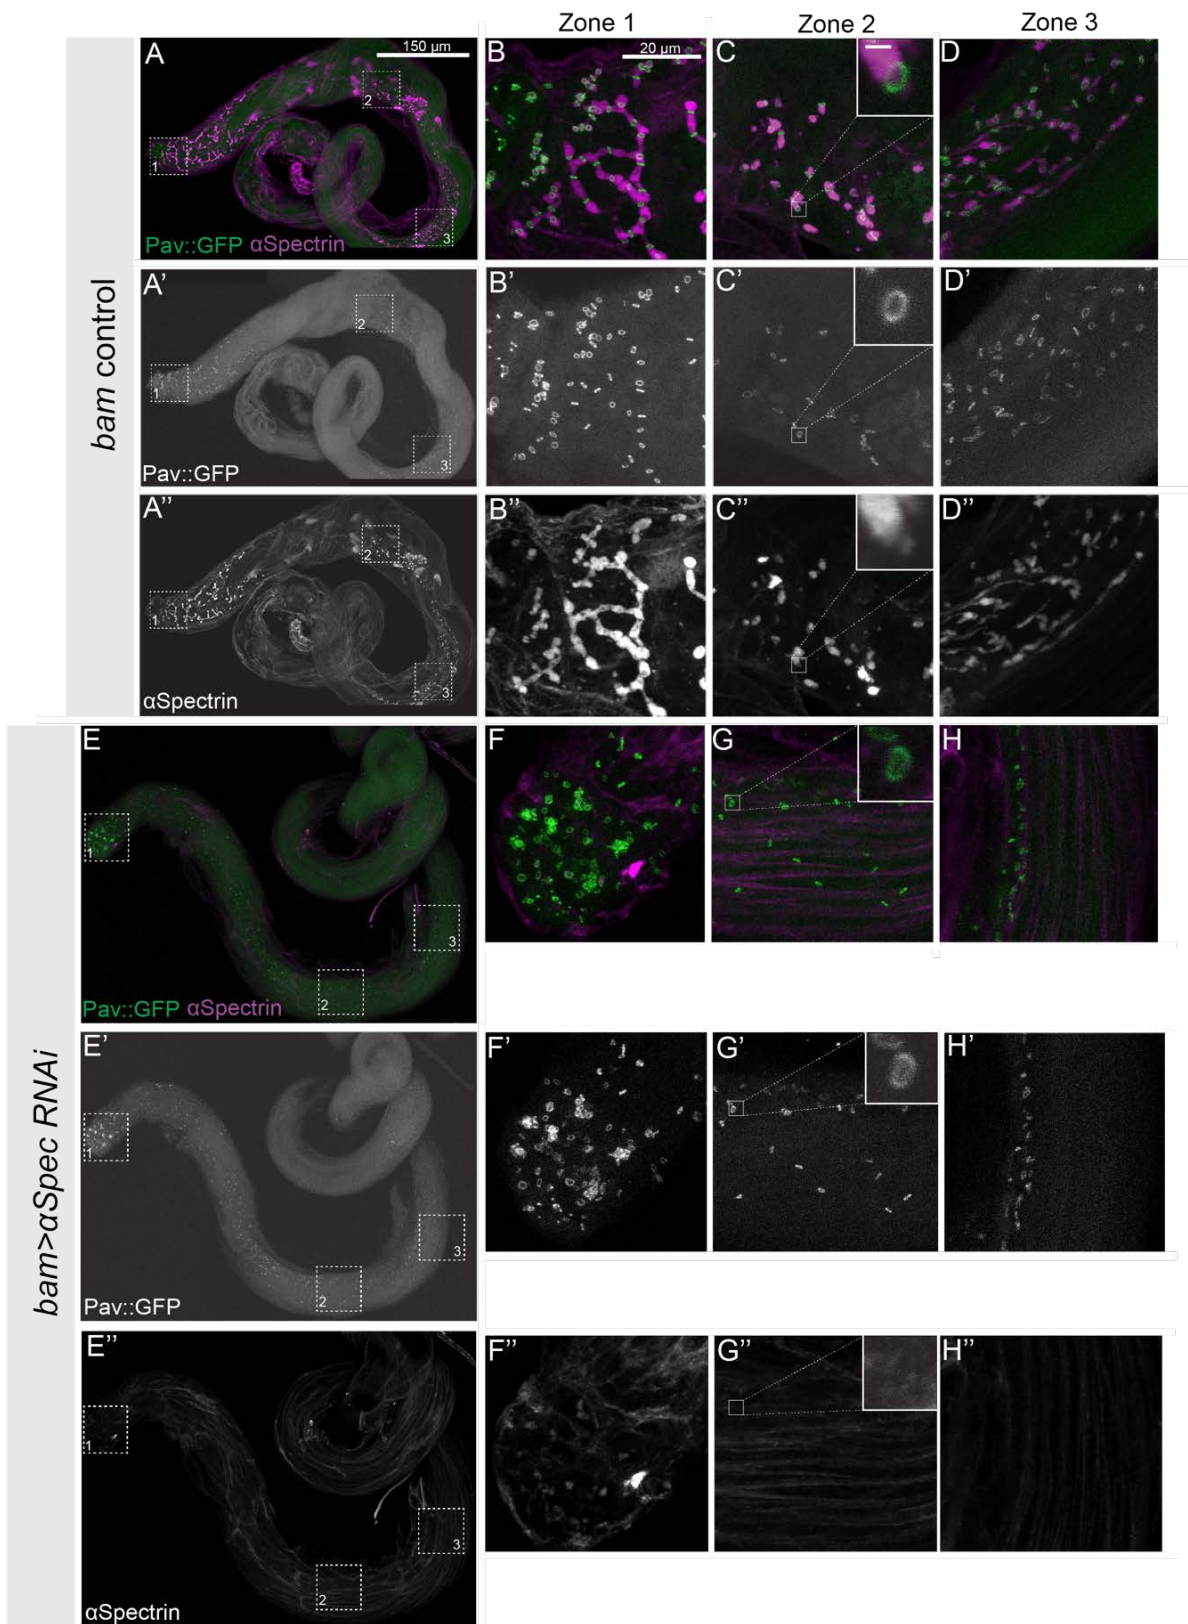

**Figure S6. Fusome disruption by RNAi against  $\alpha$ Spectrin using *bam-Gal4* ( $\alpha$ Spectrin staining).** (A)  $\alpha$ Spectrin showed staining of the fusome similar to Hts1B1 (Adducin) antibody. (B-D) Close up of regions marked in (A) showing  $\alpha$ Spectrin staining at wild-type RCs (B'-D') and the fusome (B''-D'') at various stages of sperm development. (E) Disruption of fusome using *bam-Gal4*> $\alpha$ Spectrin RNAi showed a lack of  $\alpha$ Spectrin staining at the fusome, but gross testis morphology appears unaffected. (F-H) Close up of insets from (E) showing intact RCs (F'-H') despite loss of  $\alpha$ Spectrin staining (F''-H'').

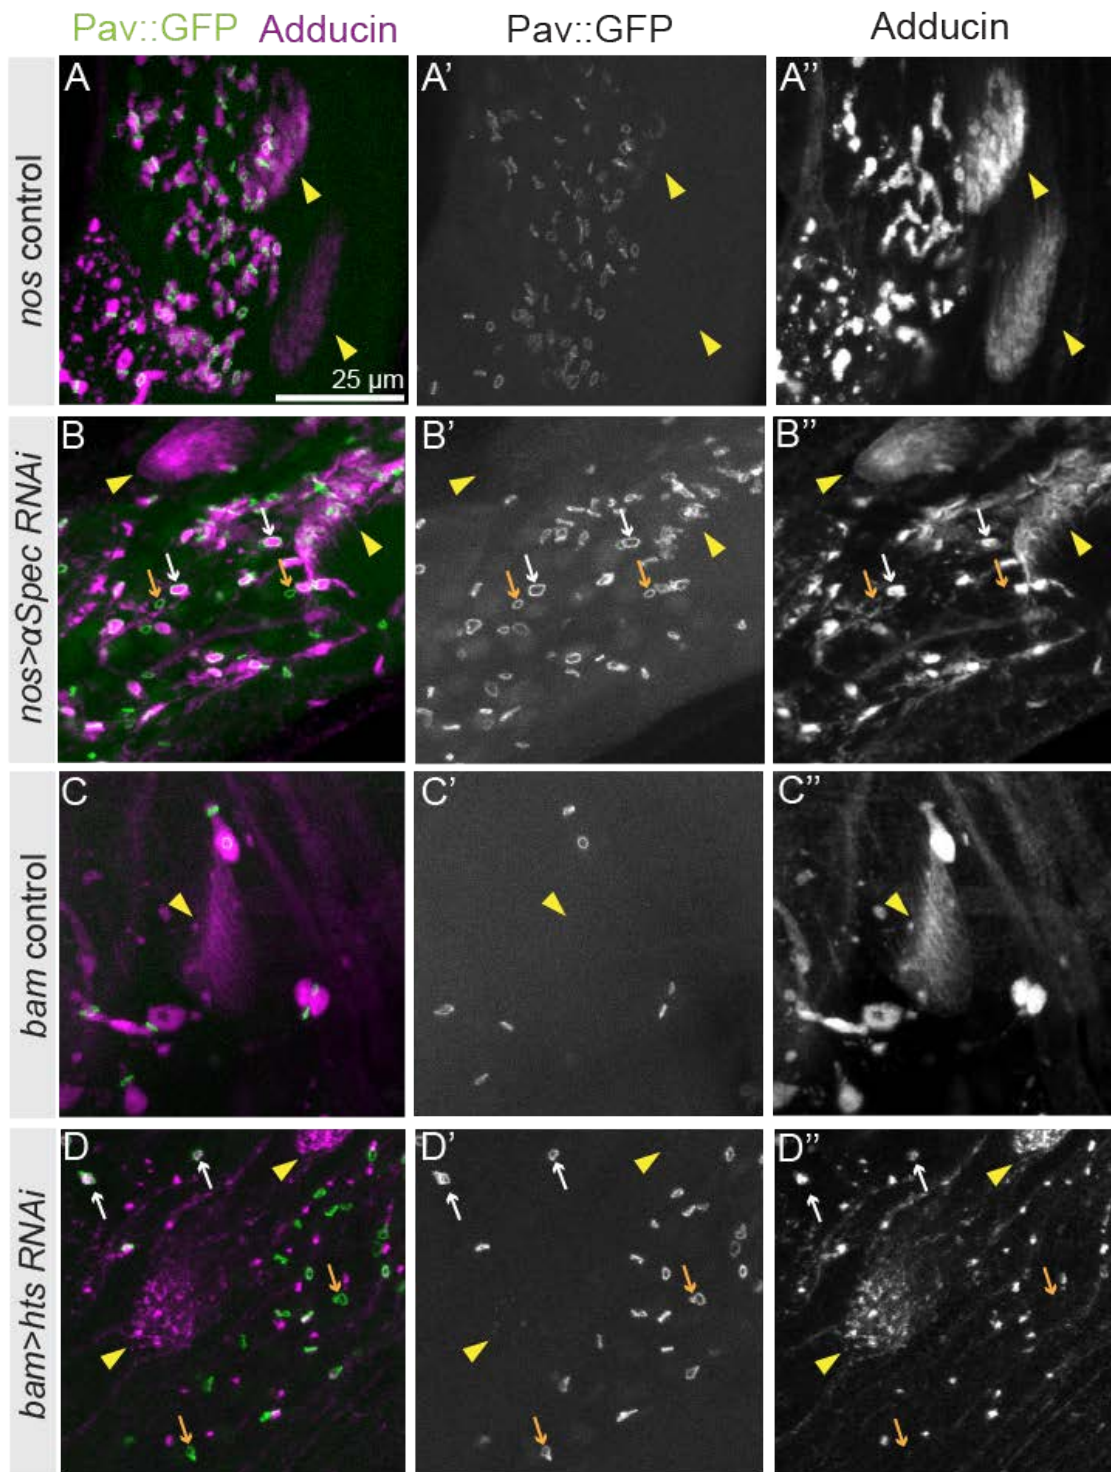

**Figure S7. Knockdown of  $\alpha$ Spec and Hts compromises the fusome but does not alter the localization of Adducin at elongating spermatid tails.** Knockdown of  $\alpha$ Spec and Hts compromises the fusome but does not alter the localization of Adducin at elongating spermatid tails. (A,C) *nos-Gal4* or *bam-Gal4* control testes (Zone 2) with RCs marked by Pav::GFP; fusomes and elongating spermatid tails (yellow arrowhead) labeled with Adducin antibody. (B) *nos> $\alpha$ Spec RNAi* testis showing fragmented fusomes and RCs that both associate with (white arrow) and fail to associate with (orange arrow) fusomes. (D) *bam>hts RNAi* testis showing fragmented fusomes and fragmented Adducin signal at the elongating spermatid tails. The majority of Pav::GFP-labeled RCs are not associated with the fusome fragments.

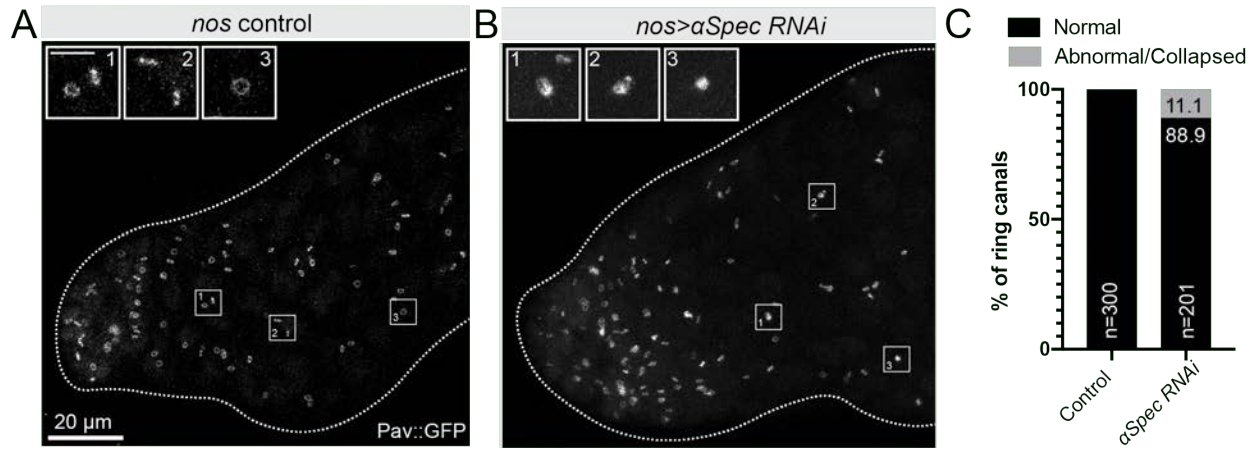

**Figure S8. RC morphology following fusome knockdown (A, B).** *nos-Gal4* control or *nos>aSpec RNAi* testes expressing Pav::GFP. (A) Boxed RCs are shown in the insets. Scale bar is 5 microns. (B) Abnormal or collapsed RCs highlighted in the insets. (C) Quantification of RC morphology.



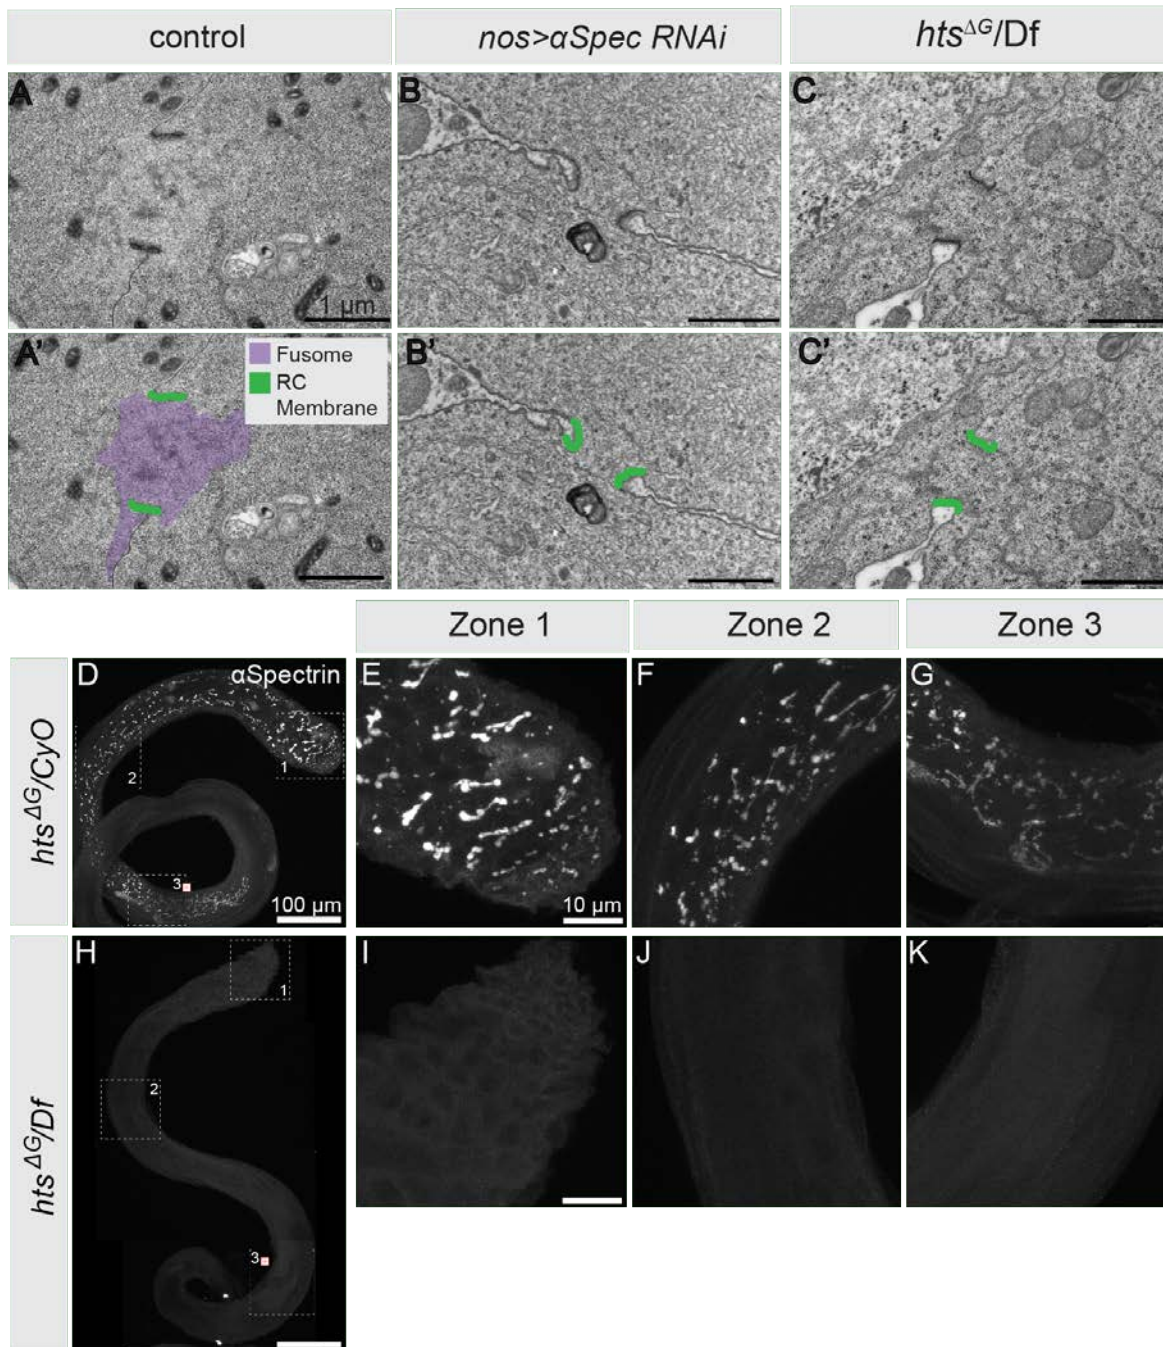

**Figure S9. Additional EM showing clear fusome in wild type and compromised fusome in *αSpectrin* RNAi and *hts<sup>ΔG</sup>* mutant testes.** (A) EM of Pav::GFP testes showing RCs surrounding the fusome, a clear ribosome deficient cloud. (A') False coloring of (A) highlighting the fusome area (purple) and RCs (green). (B) EM pictures of *nos>αSpectrin* RNAi showing a lack of clearly marked fusome between the electron dense RCs. (C) EM images of *hts<sup>ΔG</sup>/Df* testes, which show no fusome structure but intact RCs. (D) Immunofluorescence of *hts<sup>ΔG</sup>/CyO* testis stained with *αSpectrin* antibody. (E-G) Insets from (D) highlighting the presence of the fusome in various stages of spermatogonial development. (H) Immunofluorescence of *hts<sup>ΔG</sup>/Df* shows a lack of *αSpectrin* staining at a fusome, but spermatogenesis and testis morphology appear unaffected. (I-K) Insets of (H) showing a distinct lack of *αSpectrin* antibody staining during mitotic, post-mitotic, and spermatid elongation stages.

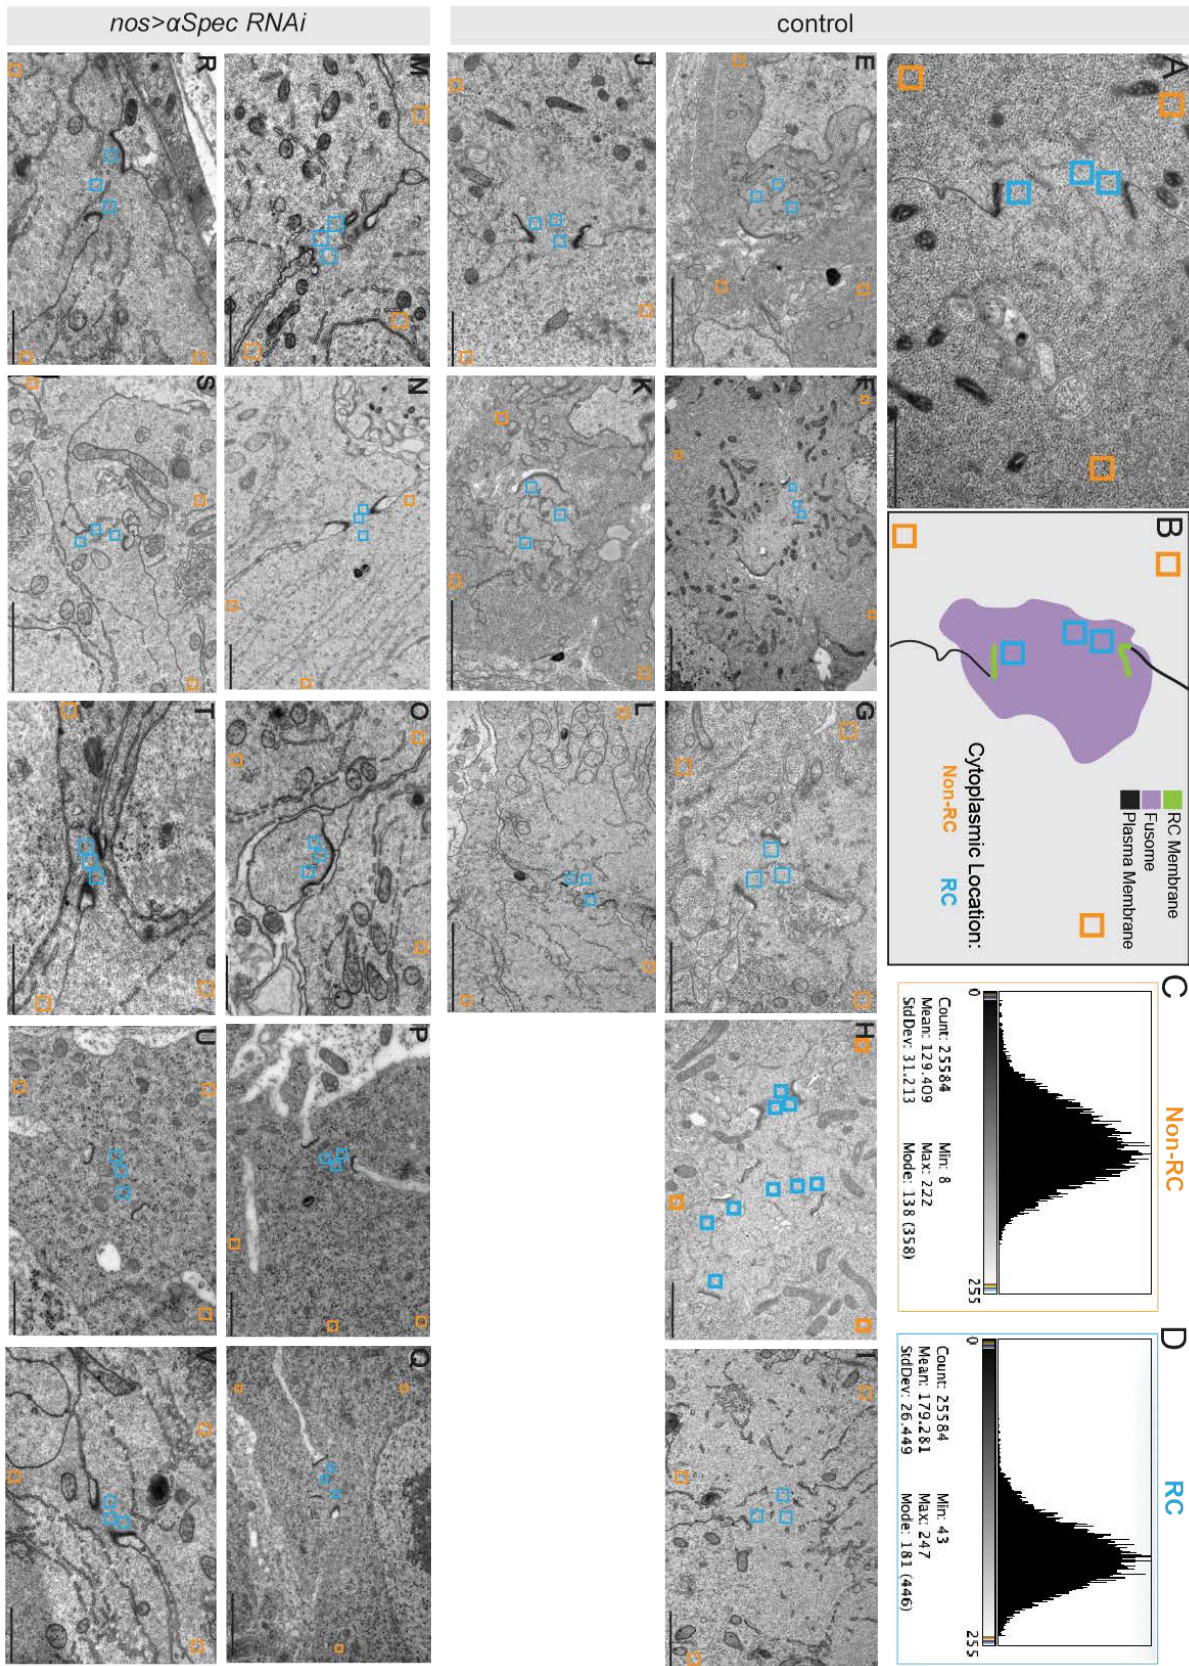

**Figure S10. Additional TEM micrographs of control and *nos>aSpec RNAi* RCs.** (A) Control RC with labeled ROIs (blue boxes mark RC cytoplasm; orange boxes mark non-RC cytoplasm) used for quantification of ribosome density. (B) Schematic of RC represented in (A) to mark the RC membrane (green), fusome (purple), plasma membrane (black). (C, D) Example histograms obtained from a single ROI in either the non-RC cytoplasm (orange) or RC cytoplasm (blue). (E-L) Electron micrographs of control RCs from which ribosome density measurements were obtained with labeled ROIs. (M) Electron micrographs of *nos>aSpec RNAi* RCs; measured ROIs are labeled.

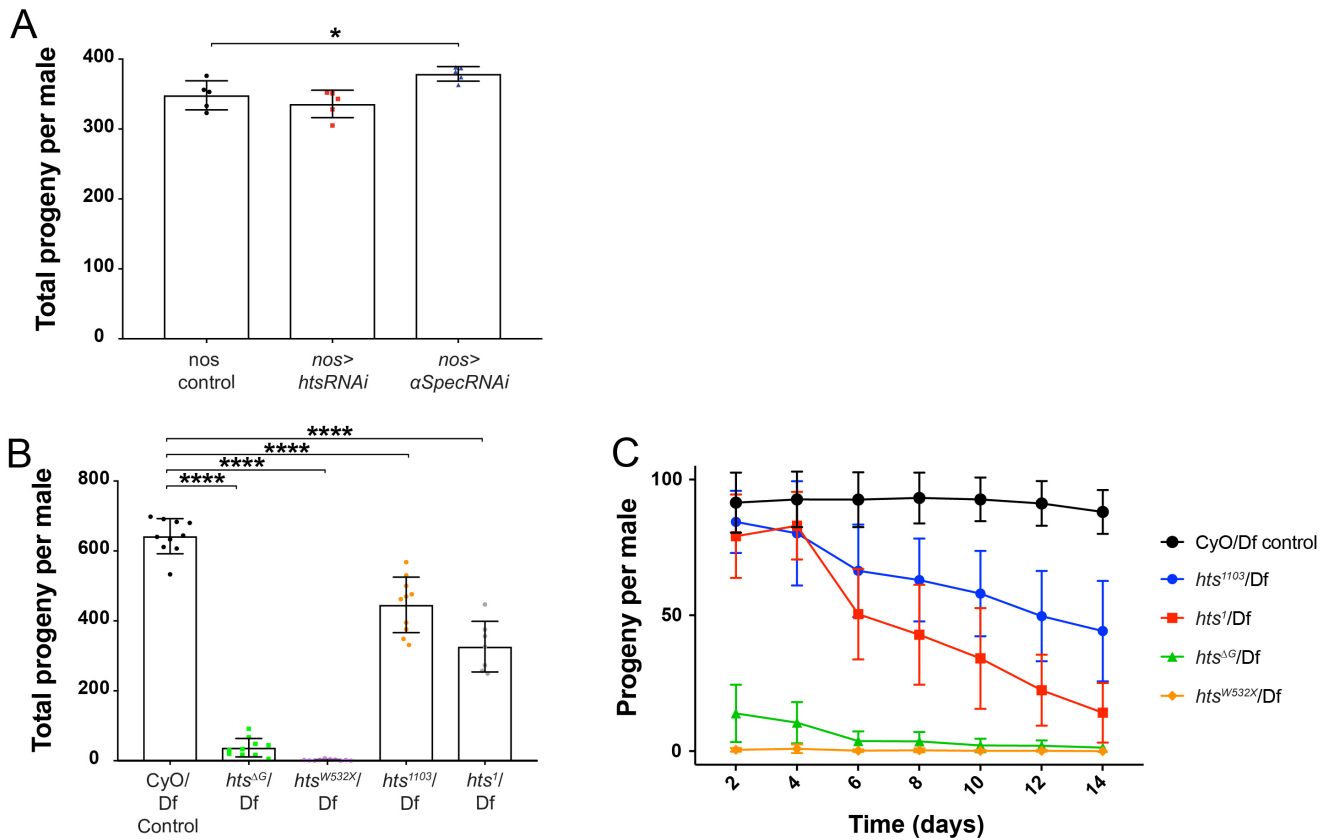

**Figure S11. Fusome knockdown by germline specific RNAi does not have an effect on fertility.** (A) Comparison of fertility (over a two-week period) as measured by total progeny per male between germline specific *nos-Gal4* control and *nos-Gal4* driving *hts* ( $p=0.45$ ) or *aSpectrin* RNAi ( $p=0.03$ ) showed a slight increase in fertility in the *aSpectrin* RNAi line. (B) Fertility assessment using *hts* alleles *hts<sup>ΔG</sup>/Df*, *hts<sup>W532X</sup>/Df*, *hts<sup>1103</sup>/Df* and *hts<sup>1</sup>/Df* showed significant decrease in fertility compared to control ( $p<0.0001$ ). (C) Fertility of *hts<sup>1103</sup>/Df* and *hts<sup>1</sup>/Df* decline over time in comparison to control. *hts<sup>ΔG</sup>/Df* and *hts<sup>W532X</sup>/Df* were consistently less fertile than controls.

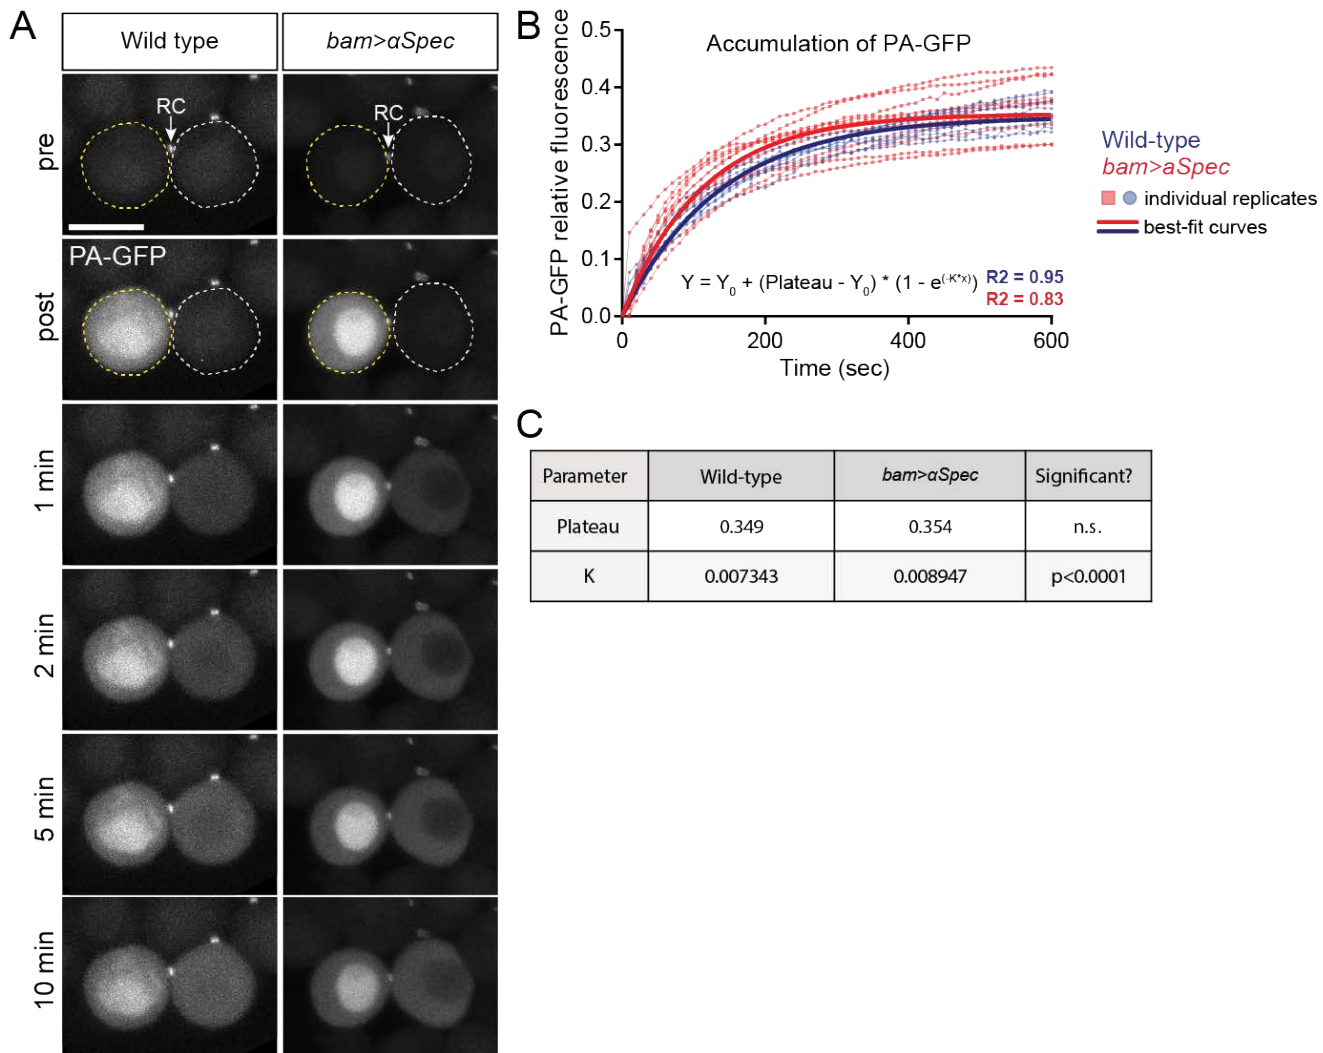

**Figure S12. Movement of PA-GFP through RCs in fusome-disrupted cells is faster than in wild-type cells.**

(A) A single cell expressing PA-GFP within a spermatocyte cyst was activated (yellow dashed outline) and PA-GFP fluorescence between the activated and recipient cell (white dashed outline) was imaged throughout a 10-minute time course in wild-type and fusome knockdown testes. Arrows indicate the RC, marked by Pav::GFP. Two-cell groups were selected for quantification, meaning that only movies in which PA-GFP diffused into a single adjacent cell were used for analysis. (B-C) Non-linear regression of PA-GFP RFU mean values (dashed lines) and fitted curves (solid lines) for both wild-type (blue lines) and fusome RNAi (red lines) testes. Both curves plateaued at the same RFU, but the rate of movement (as measured by the K rate constant parameter) in fusome RNAi was significantly faster than in wild-type ( $p < 0.0001$ ). wild-type:  $n = 9$ ; fusome RNAi:  $n = 11$ . Scale bar = 20  $\mu\text{m}$ .

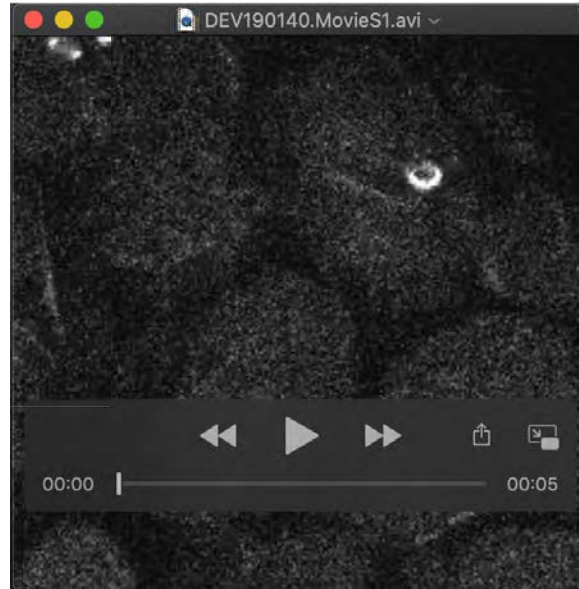

Movie 1: Movie showing movement of PA-GFP through the RCs in a 2-cell spermatogonial cyst. Photoactivation of PA-GFP in a single cell of two 2-cell spermatogonial cysts demonstrates intercellular exchange of cytoplasmic protein. Images were acquired at 30 second intervals for 10 minutes following activation.

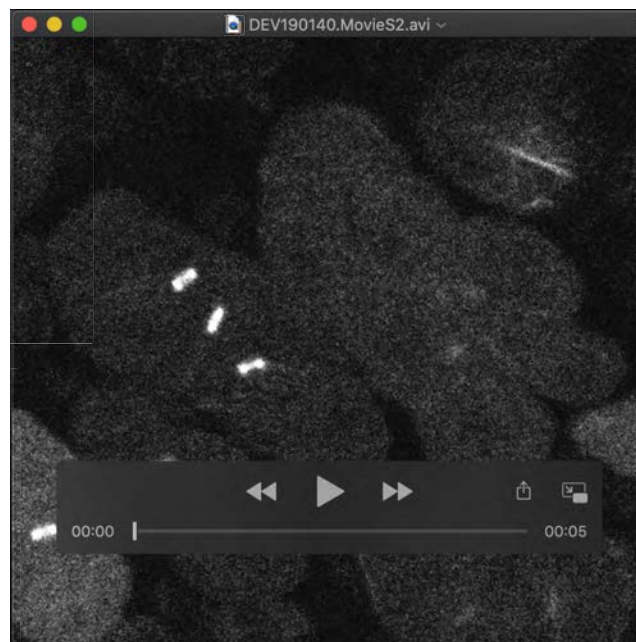

Movie 2: Movie showing movement of PA-GFP through the RCs in a 4-cell spermatogonial cyst. Photoactivation of PA-GFP in a single cell of a 4-cell spermatogonial cyst demonstrates rapid intercellular exchange of GFP. Images were acquired at 30 second intervals for 10 minutes following activation.

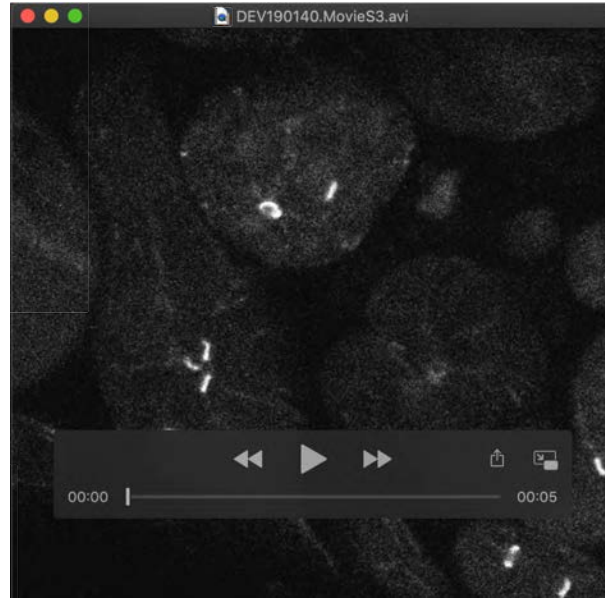

Movie 3: Movie showing movement of PA-GFP through the RCs in an 8-cell spermatogonial cyst. Photoactivation of PA-GFP in a single cell of an 8-cell spermatogonial cyst demonstrates intercellular exchange GFP through RCs in later stage mitotic cysts. Images were acquired at 30 second intervals for 10 minutes following activation.

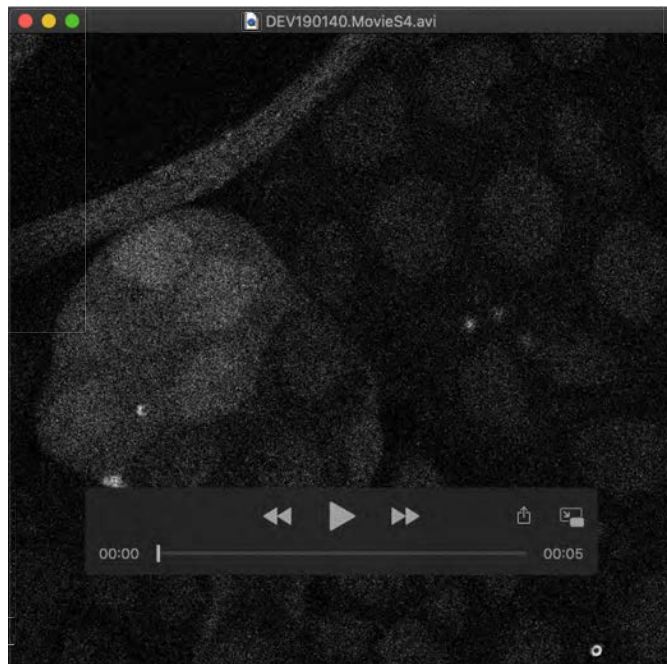

Movie 4: Movie showing movement of PA-GFP through the RCs in a 16-cell spermatocyte cyst. Photoactivation of PA-GFP in a single, center cell of a 16-cell primary spermatocyte cyst demonstrates intercellular exchange of cytoplasmic protein occurs even in cysts undergoing a growth phase. Images were acquired at 30 second intervals for 10 minutes following activation.

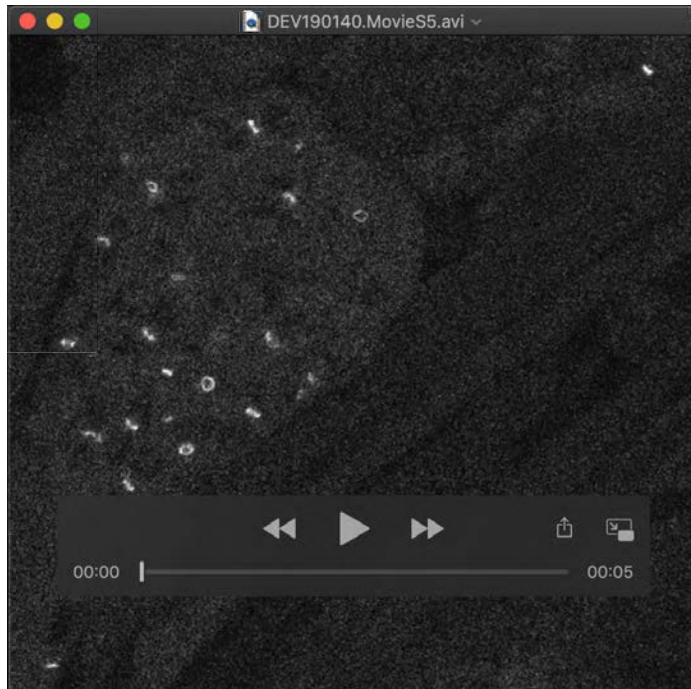

Movie 5: Movie showing movement of PA-GFP through the RCs in a 32-cell cyst. Photoactivation of PA-GFP in several cells of a 32-cell cyst demonstrates intercellular exchange of cytoplasmic protein happens during meiosis. Images were acquired at 30 second intervals for 10 minutes following activation.

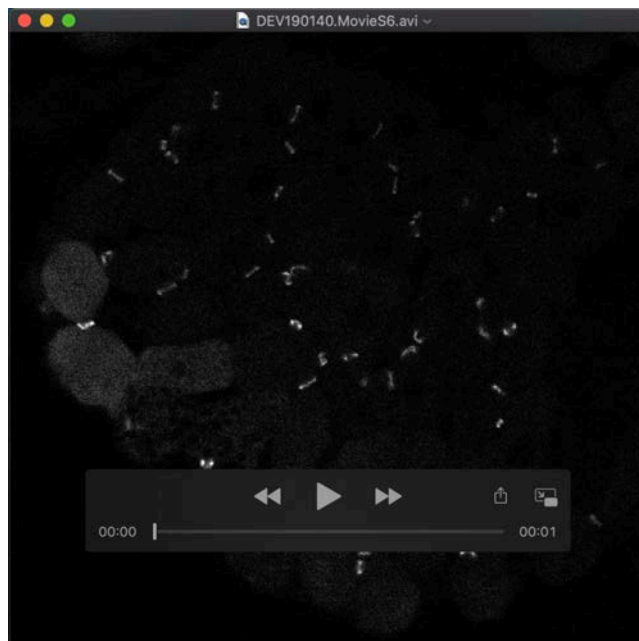

Movie 6: Movie showing movement of PA-GFP through the RCs in a 64-cell cyst. Photoactivation of PA-GFP in 2 single cells of a 64-cell post-meiotic cyst demonstrates protein exchange occurs post-meiotically. Images were acquired at 30 second intervals for 10 minutes following activation.

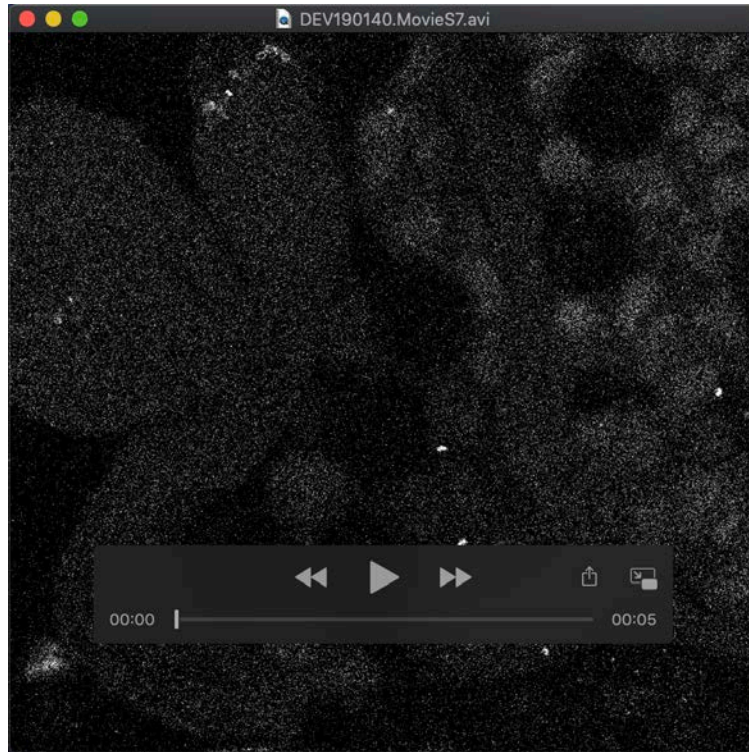

Movie 7: Movie showing movement of PA-GFP through the RCs in elongating spermatids. Photoactivation of PA-GFP in a subset of spermatids demonstrates intercellular exchange of cytoplasmic protein occurs post-tail elongation. Images were acquired at 30 second intervals for 10 minutes following activation.

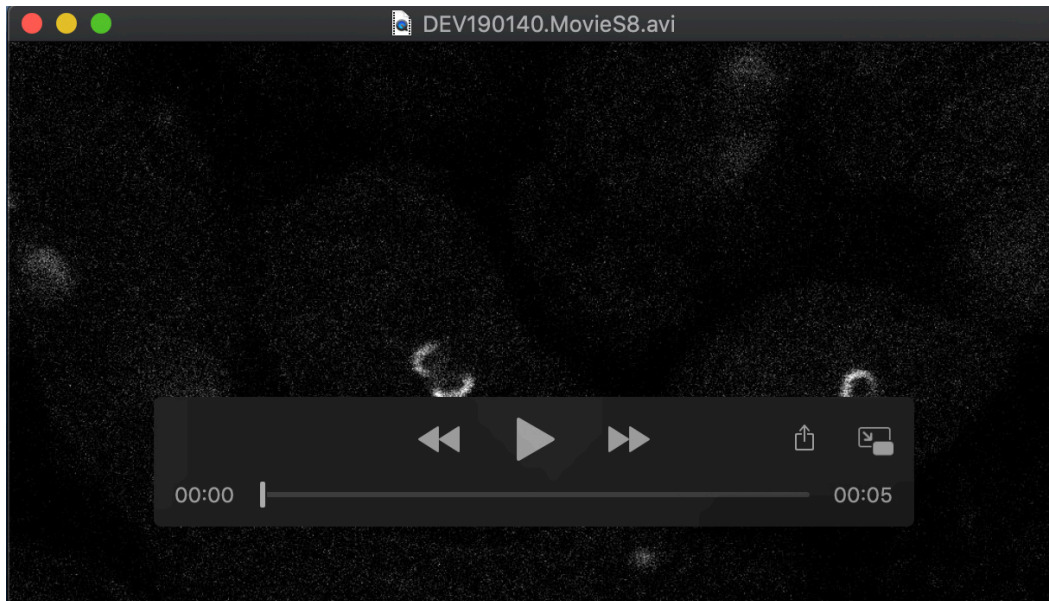

Movie 8: Moving showing movement of PA-GFP through the RCs in 2- and 4-cell spermatogonial cysts lacking a fusome. Photoactivation of PA-GFP in single cells of 2- and 4-cell spermatogonial cysts in *nos-Gal4>aSpectrin* RNAi testes demonstrates intercellular exchange of cytoplasmic protein occurs despite the lack of fusome structure. Images were acquired at 30 second intervals for 10 minutes following activation.



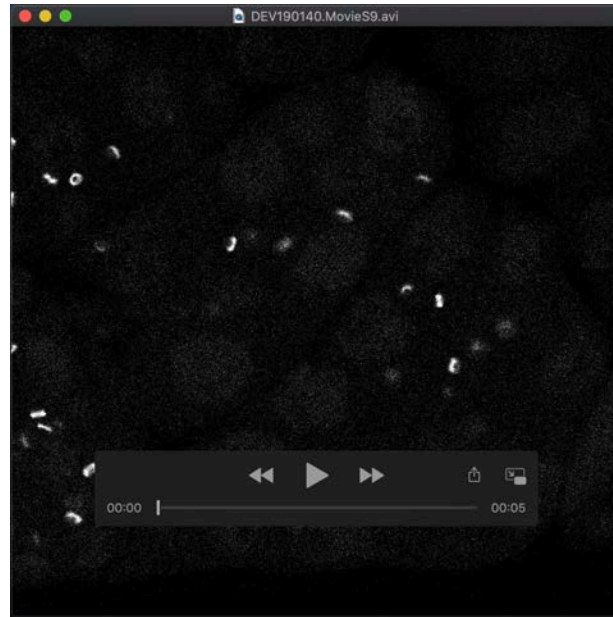

Movie 9: Movie showing movement of PA-GFP through the RCs in a 16-cell spermatocyte cyst lacking a fusome. Photoactivation of PA-GFP in a single cell of 16-cell spermatocyte cyst in *bam-Gal4> $\alpha$ Spectrin* RNAi testes demonstrates intercellular exchange of PA-GFP is not mediated by the fusome in primary spermatocytes. Images were acquired at 30 second intervals for 10 minutes following activation.

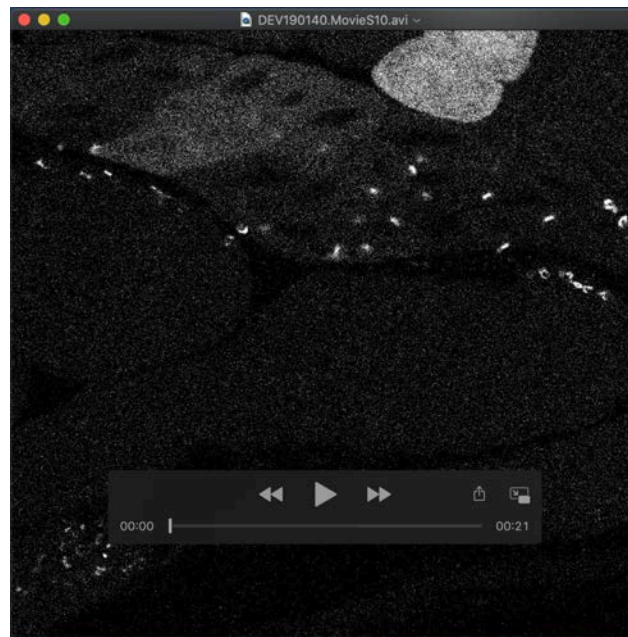

Movie 10: Movie showing movement of PA-GFP through the RCs in a spermatids lacking a fusome. Photoactivation of PA-GFP in a subset of spermatids in *bam-Gal4> $\alpha$ Spectrin* RNAi testes demonstrates intercellular exchange of PA-GFP is not mediated by the fusome post-meiotically. Images were acquired at 30 second intervals for 40 minutes following activation.

**Table S1. Reagents**

| REAGENT or RESOURCE                                                                                                                                                                   | SOURCE                                          | IDENTIFIER                                                                                                          |
|---------------------------------------------------------------------------------------------------------------------------------------------------------------------------------------|-------------------------------------------------|---------------------------------------------------------------------------------------------------------------------|
| <b>Antibodies</b>                                                                                                                                                                     |                                                 |                                                                                                                     |
| Mouse monoclonal anti-Hts (1B1)                                                                                                                                                       | Developmental Studies Hybridoma Bank            | Cat#1b1, RRID:AB_528070                                                                                             |
| Mouse monoclonal anti- $\alpha$ Spec (3A9)                                                                                                                                            | Developmental Studies Hybridoma Bank            | Cat#3A9 (323 or M10-2), RRID:AB_528473                                                                              |
| Goat anti-mouse IgG Secondary Antibody, Alexa Fluor 568                                                                                                                               | Thermo Fisher Scientific                        | Cat#A-11031, RRID: AB_144696                                                                                        |
| <b>Chemicals and Recombinant Protein</b>                                                                                                                                              |                                                 |                                                                                                                     |
| Paraformaldehyde, 16% solution, EM grade                                                                                                                                              | VWR                                             | Cat#15710-5                                                                                                         |
| Bovine Serum Albumin                                                                                                                                                                  | AmericanBio                                     | Cat#AB01088                                                                                                         |
| Triton X-100                                                                                                                                                                          | AmericanBio                                     | Cat#AB02025-00500                                                                                                   |
| ProLong Gold Antifade Mountant                                                                                                                                                        | Thermo Fisher Scientific                        | Cat#P36934                                                                                                          |
| Aqua-Poly/Mount                                                                                                                                                                       | Polysciences, Inc.                              | Cat#18606                                                                                                           |
| <b>Experimental Models</b>                                                                                                                                                            |                                                 |                                                                                                                     |
| D. melanogaster: pJFRC92-20XUAS-IVS-Syn21-mC3PAGFP-p10                                                                                                                                | Laboratory of G. Rubin; Pfeiffer et al. 2012    | N/A                                                                                                                 |
| D. melanogaster: Bam-Gal4: W1118; P[Bam-Gal4:VP16]                                                                                                                                    | Laboratory of D. McKearin; Chen & McKearin 2003 | N/A                                                                                                                 |
| D. melanogaster: hts $\Delta$ G                                                                                                                                                       | Zuker collection, Koundakjian et al., 2004      | FlyBase ID: FBal0212993                                                                                             |
| D. melanogaster: Tub-Gal4: y1 w*; P{w+mC=tubP-GAL4}LL7/TM3, Sb1 Ser1                                                                                                                  | Bloomington Drosophila Stock Center             | RRID:BDSC_5138                                                                                                      |
| D. melanogaster: Nos-Gal4: P{w+mC=GAL4:VP16-nos.UTR}MVD2, w1118                                                                                                                       | Bloomington Drosophila Stock Center             | RRID:BDSC_7303                                                                                                      |
| D. melanogaster: $\alpha$ Spectrin shRNA: y1 sc* v1; P{y+7.7 v+1.8=TriP.HMC04371}attP40                                                                                               | Bloomington Drosophila Stock Center             | RRID:BDSC_56932                                                                                                     |
| D. melanogaster: hts Df: w{1118}; Df{2R}BSC135/CyO                                                                                                                                    | Bloomington Drosophila Stock Center             | RRID:BDSC_9423                                                                                                      |
| D. melanogaster: y[1] M{RFP[3xP3.PB] GFP[E.3xP3]=vas-int.Dm}ZH-2A w*; PBac{y+}-attP-3B}VK00037                                                                                        | Bloomington Drosophila Stock Center             | RRID:BDSC_24872                                                                                                     |
| D. melanogaster: JFRC81-10XUAS-IVS-Syn21-GFP-p10                                                                                                                                      | Laboratory of G. Rubin; Pfeiffer et al. 2012    | N/A                                                                                                                 |
| D. melanogaster: Cam::GFP                                                                                                                                                             | Laboratory of L. Cooley; Kelso et al. 2004      | YC0069LE                                                                                                            |
| D. melanogaster: Clu::GFP: w1118; P{w+mC=PTT-GA}cluG00271                                                                                                                             | Bloomington Drosophila Stock Center             | RRID:BDSC_6842                                                                                                      |
| D. melanogaster: EIF4 $\alpha$ ::GFP                                                                                                                                                  | Laboratory of L. Cooley; Kelso et al. 2004      | YC0001                                                                                                              |
| D. melanogaster: EIF4E1::GFP: y1 w*/Dp{1;Y}y+; P{w+mC=PTT-GC}elf4E1YC0001                                                                                                             | Bloomington Drosophila Stock Center             | RRID:BDSC_50858                                                                                                     |
| D. melanogaster: G0320::GFP: w* P{w+mC=PTT-un1}(1)G0320 <sup>G00024</sup>                                                                                                             | Bloomington Drosophila Stock Center             | RRID:BDSC_50839                                                                                                     |
| D. melanogaster: Lost::GFP: w1118; P{w+mC=PTT-GA}lostZCL3169                                                                                                                          | Bloomington Drosophila Stock Center             | RRID:BDSC_6832                                                                                                      |
| D. melanogaster: Mito::GFP: w1118; P{w+mC=UAS-mito-HA-GFP.AP}2/CyO                                                                                                                    | Bloomington Drosophila Stock Center             | RRID:BDSC_8442                                                                                                      |
| D. melanogaster: Pdc4::GFP: w1118 P{w+mC=PTT-GB}Pdc4G93                                                                                                                               | Bloomington Drosophila Stock Center             | RRID:BDSC_38446                                                                                                     |
| D. melanogaster: Sgg::GFP: y1 P{w+mC=PTT-un1}sggZCL1912 w*                                                                                                                            | Bloomington Drosophila Stock Center             | RRID:BDSC_50887                                                                                                     |
| D. melanogaster: Kra::GFP: y1 w*; l(2)**/In(2LR)Gla, wgGla-1; PBac{y+mDint2=Hpal-GFP.A}kraYD0086/TM6C, Sb1                                                                            | Bloomington Drosophila Stock Center             | RRID:BDSC_50873                                                                                                     |
| D. melanogaster: Men-B::GFP: w*; l(2)**/In(2LR)Gla, wgGla-1; P{w+mC=PTT-GB}Men-bYB0142                                                                                                | Bloomington Drosophila Stock Center             | RRID:BDSC_50854                                                                                                     |
| D. melanogaster: Oda::GFP                                                                                                                                                             | Laboratory of L. Cooley; Kelso et al. 2004      | YD0523                                                                                                              |
| D. melanogaster: $\beta$ Tub56D::GFP: w*; P{w+mC=PTT-GC}betaTub56DYC0063/CyO                                                                                                          | Bloomington Drosophila Stock Center             | RRID:BDSC_50867                                                                                                     |
| <b>Oligonucleotides</b>                                                                                                                                                               |                                                 |                                                                                                                     |
| Primer for HA::KnSm::FLAG (forward): TACCCCTACGACGTGCCCGACTACGCatctggacaagggaaaacg                                                                                                    | This study                                      | N/A                                                                                                                 |
| Primer for HA::KnSm::FLAG (reverse): CTTATCGTCATCATCCTTGTAACTatctcgtgatggcaggttg                                                                                                      | This study                                      | N/A                                                                                                                 |
| Primer for HA::GFP::FLAG (forward): TACCCCTACGACGTGCCCGACTACGCATGTCCAAAGGTGAAGAAGCTG                                                                                                  | This study                                      | N/A                                                                                                                 |
| Primer for HA::GFP::FLAG (reverse): TTACTTATCGTCATCATCCTTGTAACTCTGTAGAGCTCATCCATGC                                                                                                    | This study                                      | N/A                                                                                                                 |
| Primer for insertion of KnSm cassette and HA::GFP::FLAG at the Pav c-terminus for Pav::GFP BAC transgene (forward): CCCGCTGCAATCTCGCATTGAGGACACAGCAGCAAGAAGTCGAAAATCTACCCCTACGACGTGCC | This study                                      | N/A                                                                                                                 |
| Primer for insertion of KnSm cassette and HA::GFP::FLAG at the Pav c-terminus for Pav::GFP BAC transgene (reverse): CTATGAACATAATGGTAATTGAGAAITCCACGCTGAGTCAITTTTACTTATCGTCATCATCCTTG | This study                                      | N/A                                                                                                                 |
| <b>Recombinant DNA</b>                                                                                                                                                                |                                                 |                                                                                                                     |
| BAC CH322-102N03                                                                                                                                                                      | CHORI                                           | N/A                                                                                                                 |
| <b>Software</b>                                                                                                                                                                       |                                                 |                                                                                                                     |
| ImageJ/FIJI                                                                                                                                                                           | NIH                                             | <a href="https://fiji.sc/">https://fiji.sc/</a>                                                                     |
| Prism 7                                                                                                                                                                               | GraphPad                                        | <a href="https://www.graphpad.com/scientificsoftware/prism/">https://www.graphpad.com/scientificsoftware/prism/</a> |
| Imaris 9.0                                                                                                                                                                            | Bitplane                                        | <a href="http://www.bitplane.com/">http://www.bitplane.com/</a>                                                     |
| <b>Other</b>                                                                                                                                                                          |                                                 |                                                                                                                     |
| Drosophila transgenesis: site-specific integration                                                                                                                                    | Rainbow Transgenic Flies, Inc.                  | <a href="http://www.rainbowgene.com/">http://www.rainbowgene.com/</a>                                               |
